# Supplementary material for: Hyperbaric oxygen treatment for late radiation-induced tissue toxicity in treated gynaecological cancer patients: a systematic review
Source: Springer Nature journal article supplement (doi:10.1186/s13014-022-02067-6), 2022-10-06
Supplement: MOESM2 [file 23577658]

**Table 5.** Literature search in Embase

| Search                                                                                                                                                                                                                                            | Items found |
|---------------------------------------------------------------------------------------------------------------------------------------------------------------------------------------------------------------------------------------------------|-------------|
| ('gynecological cancer'/exp OR 'gynecological cancer' OR (gynecological AND ('cancer'/exp OR cancer)) OR 'female genital tract cancer'/exp OR 'female genital tract cancer') AND ('hyperbaric oxygen therapy'/exp OR 'hyperbaric oxygen therapy') | <b>173</b>  |
