# Supplementary material for: Hyperbaric oxygen treatment for late radiation-induced tissue toxicity in treated gynaecological cancer patients: a systematic review
Source: Springer Nature journal article supplement (doi:10.1186/s13014-022-02067-6), 2022-10-06
Supplement: MOESM3 [file 23577658]

**Table 6.** Literature search in the Cochrane Library

| Search                                                                                                                                                                                                     | Items found |
|------------------------------------------------------------------------------------------------------------------------------------------------------------------------------------------------------------|-------------|
| MeSH Descriptor: [Hyperbaric Oxygenation] explode all trees OR {'hyperbaric oxygen therapy'}:ti,ab,kw AND MeSH descriptor: [Genital Diseases, Female] explode all trees OR (gynecological cancer):ti,ab,kw | <b>18</b>   |
