# Supplementary material for: Hyperbaric oxygen treatment for late radiation-induced tissue toxicity in treated gynaecological cancer patients: a systematic review
Source: Springer Nature journal article supplement (doi:10.1186/s13014-022-02067-6), 2022-10-06
Supplement: MOESM4 [file 23577658]

**Table 7.** Reasons of exclusion from PubMed search

| Author(s)         | Year | Journal abbreviation                | Reason of exclusion     |
|-------------------|------|-------------------------------------|-------------------------|
| Watson et al      | 1970 | Br J Radiol.                        | Article not available   |
| Roulston et al    | 1968 | J Obstet Gynaecol Br Commonw.       | Article not available   |
| Johnson et al     | 1967 | Natl Cancer Inst Monogr.            | Article not available   |
| Proshina et al    | 1985 | Anesteziol Reanimatol.              | Article not available   |
| Ward et al        | 1979 | Br J Radiol.                        | Article not available   |
| Wakabayashi et al | 1971 | Nihon Igaku Hoshasen Gakkai Zasshi. | Article not available   |
| Huddy et al       | 2006 | Eur J Gastroenterol Hepatol.        | Case report             |
| Harlan et al      | 2015 | Undersea Hyperb Med.                | Case report             |
| Kärcher et al     | 1975 | Wien Klin Wochenschr.               | Case report             |
| Dische et al      | 1972 | Br J Radiol.                        | Case report             |
| King et al        | 2012 | Arch Otolaryngol Head Neck Surg.    | Case report             |
| Yazawa et al      | 1995 | Int Urol Nephrol.                   | Case report             |
| Liu et al         | 2017 | Medicine (Baltimore).               | Case report             |
| Bruni et al       | 1972 | J Oral Surg.                        | Case report             |
| Maurel et al      | 2020 | Gynecol Obstet Fertil Senol.        | Case report             |
| Wang et al        | 1999 | Eur J Obstet Gynecol Reprod Biol.   | Case report             |
| Abu-Asi et al     | 2013 | Support Care Cancer.                | Case series             |
| Nakada et al      | 1992 | Eur Urol.                           | Case series             |
| Griffiths et al   | 2018 | Gynecol Oncol Rep.                  | Case series             |
| Da Silva et al    | 2018 | Childs Nerv Syst.                   | Exclusive patient group |
| Nie et al         | 2014 | Sheng Li Xue Bao.                   | Exclusive patient group |
| You et al         | 2014 | Undersea Hyperb Med.                | Exclusive patient group |
| Meah et al        | 2018 | J Low Genit Tract Dis.              | Exclusive patient group |

|                 |      |                                            |                                |
|-----------------|------|--------------------------------------------|--------------------------------|
| Hu et al        | 2017 | Stroke.                                    | Exclusive patient group        |
| Limirio et al   | 2018 | PLoS One.                                  | Exclusive patient group        |
| Dai et al       | 2015 | Ann Plast Surg.                            | Exclusive patient group        |
| Chen et al      | 2014 | Neuroscience.                              | Exclusive patient group        |
| Soejima et al   | 2013 | Exp Neurol.                                | Exclusive patient group        |
| Hayashi et al   | 2012 | J Reprod Dev.                              | Exclusive patient group        |
| Frezza et al    | 2015 | Acta Trop.                                 | Exclusive patient group        |
| Bilici et al    | 2015 | Facial Plast Surg.                         | Exclusive patient group        |
| Yalcin et al    | 2014 | Undersea Hyperb Med.                       | Exclusive patient group        |
| Zhao et al      | 2011 | Exp Brain Res.                             | Exclusive patient group        |
| Hsu et al       | 2004 | J trauma.                                  | Exclusive patient group        |
| Zhang et al     | 2005 | Zhonghua Gan Zang Bing Za Zhi.             | Exclusive patient group        |
| Vlodavsky et al | 2006 | Neuropathol Appl Neurobiol.                | Exclusive patient group        |
| Veltkamp et al  | 2006 | Brain Res.                                 | Exclusive patient group        |
| Atis et al      | 2012 | Reprod Biol Endocrinol.                    | Exclusive patient group        |
| Ishii et al     | 2002 | J Orthop Res.                              | Exclusive patient group        |
| Syftestad et al | 1976 | Undersea Biomed Res.                       | Exclusive patient group        |
| Lammers et al   | 2008 | Am J Physiol Heart Circ Physiol.           | Exclusive patient group        |
| Muhonen et al   | 2006 | Int J Oral Maxillofac Surg.                | Exclusive patient group        |
| Nguyen et al    | 2020 | Wound Repair Regen.                        | Exclusive patient group        |
| Rattazzi et al  | 1980 | Birth Defects Orig Artic Ser.              | Exclusive patient group        |
| Pires et al     | 2002 | Prog Urol.                                 | Language                       |
| Bates et al     | 1974 | Br J Radiol.                               | Letter                         |
| Placer et al    | 1990 | Enferm Infecc Microbiol Clin.              | Letter                         |
| Corcoran et al  | 2017 | Prostaglandines Leukot Essent Fatty Acids. | No gynaecological malignancies |

|                         |      |                              |                                |
|-------------------------|------|------------------------------|--------------------------------|
| Tao et al               | 2019 | Exp Ther Med.                | No gynaecological malignancies |
| Tlapák et al            | 2020 | Undersea Hyperb Med.         | No gynaecological malignancies |
| Jean dit Gautier et al  | 2015 | Int J Gynaecol Obstet.       | No gynaecological malignancies |
| Condemi et al           | 2018 | Eur Rev Med Pharmacol Sci.   | No gynaecological malignancies |
| Al Hadi et al           | 2015 | J Dent.                      | No gynaecological malignancies |
| Michalski et al         | 2011 | Acta Neurol Scand.           | No gynaecological malignancies |
| Zhang et al             | 2013 | J Invest Dermatol.           | No gynaecological malignancies |
| Costa et al             | 2015 | Acta Med Port.               | No gynaecological malignancies |
| Jacomini et al          | 2012 | Undersea Hyperb Med.         | No gynaecological malignancies |
| Cherng et al            | 2012 | Ann Plast Surg.              | No gynaecological malignancies |
| Yang et al              | 2013 | Life Sci.                    | No gynaecological malignancies |
| Douso et al             | 2009 | J Minim Invasive Gynecol.    | No gynaecological malignancies |
| Jung et al              | 2010 | Head Face Med.               | No gynaecological malignancies |
| Svensson et al          | 2008 | J Pediatr Surg.              | No gynaecological malignancies |
| Shyu et al              | 2009 | Clin Sci (Lond).             | No gynaecological malignancies |
| Ostrowski et al         | 2010 | Acta Neurochir Suppl.        | No gynaecological malignancies |
| Lekic et al             | 2011 | Acta Neurochir Suppl.        | No gynaecological malignancies |
| Alleva et al            | 2008 | Mol Med.                     | No gynaecological malignancies |
| Romero-Valdovinos et al | 2011 | In Vitro Cell Dev Biol Anim. | No gynaecological malignancies |
| Gordillo et al          | 2003 | Am J Surg.                   | No gynaecological malignancies |
| Tompach et al           | 1997 | Int J Oral Maxillofac Surg.  | No gynaecological malignancies |
| Kirschbaum et al        | 1969 | Pediatr Res.                 | No gynaecological malignancies |
| Bonito et al            | 1968 | Riv Ital Ginecol.            | No gynaecological malignancies |
| Roberts et al           | 1994 | Br J Dermatol.               | No gynaecological malignancies |
| Myers et al             | 1990 | NCI Monogr.                  | No gynaecological malignancies |

|                   |      |                              |                                |
|-------------------|------|------------------------------|--------------------------------|
| Guillard et al    | 2010 | Undersea Hyperb Med.         | No gynaecological malignancies |
| Wu et al          | 2010 | J Am Podiatr Med Assoc.      | No gynaecological malignancies |
| Farmer et al      | 1978 | Ann Otol Rhinol Laryngol.    | No gynaecological malignancies |
| Hanson et al      | 1966 | Postgrad Med J.              | No gynaecological malignancies |
| Mikhalenko et al  | 1972 | Pediatr Akus Ginekol.        | No gynaecological malignancies |
| Sun et al         | 2010 | J Cereb Blood Flow Metab.    | No gynaecological malignancies |
| Macdougall et al  | 1967 | Exp Cell Res.                | No gynaecological malignancies |
| Chessex et al     | 2010 | Free Radic Biol Med.         | No gynaecological malignancies |
| Rivenzon et al    | 1965 | Oncologia.                   | No gynaecological malignancies |
| Thibault et al    | 2013 | Brachytherapy.               | No gynaecological malignancies |
| White et al       | 2018 | J Pediatr Urol.              | No gynaecological malignancies |
| Bakker et al      | 2000 | Ned Tijdschr Geneesk.        | No gynaecological malignancies |
| Fearmonti et al   | 2016 | Wounds.                      | No gynaecological malignancies |
| Babenerd et al    | 1969 | Gynakol Rundsch.             | No gynaecological malignancies |
| Tkachenko et al   | 1988 | Vestn Khir Im I I Grek.      | No gynaecological malignancies |
| Delanian et al    | 2008 | Chir Main.                   | No gynaecological malignancies |
| Chaika et al      | 1990 | Akush Ginekol (Mosk).        | No gynaecological malignancies |
| Carl et al        | 1998 | J Prosthet Dent.             | No gynaecological malignancies |
| Asribekova et al  | 1991 | Probl Endokrinol (Mosk).     | No gynaecological malignancies |
| Wakabayashi et al | 1970 | Gan No Rinsho.               | No gynaecological malignancies |
| Bogdán et al      | 2005 | Orv Hetil.                   | No gynaecological malignancies |
| Proshina et al    | 1982 | Med Sestra.                  | No gynaecological malignancies |
| Persianinov et al | 1978 | Anesteziol Reanimatol.       | No gynaecological malignancies |
| Chernukha et al   | 1986 | Akush Ginekol (Mosk).        | No gynaecological malignancies |
| Willis et al      | 1984 | Scand J gastroenterol Suppl. | No gynaecological malignancies |

|                       |      |                                  |                                |
|-----------------------|------|----------------------------------|--------------------------------|
| Niezgoda et al        | 2005 | Adv Skin Wound Care.             | No gynaecological malignancies |
| Hong et al            | 2019 | Arch Craniofac Surg.             | No gynaecological malignancies |
| Colón et al           | 2013 | Bol Asoc Med P R.                | No gynaecological malignancies |
| Sidel'nikova et al    | 1991 | Akush Ginekol (Mosk).            | No gynaecological malignancies |
| Burler et al          | 1989 | Akush Ginekol (Mosk).            | No gynaecological malignancies |
| Nigro et al           | 2018 | Plast Reconstr Surg Glob Open.   | No gynaecological malignancies |
| Yang et al            | 2017 | Med Gas Res.                     | No gynaecological malignancies |
| Asadamongkol et al    | 2014 | Med Gas Res.                     | No gynaecological malignancies |
| Hart et al            | 2012 | Adv Wound Care (New Rochelle).   | No gynaecological malignancies |
| Mrdjenovich et al     | 2010 | J Am Col Certif Wound Spec.      | No gynaecological malignancies |
| Eggert et al          | 2007 | Wounds.                          | No gynaecological malignancies |
| Roberts et al         | 1994 | J Wound Care.                    | No gynaecological malignancies |
| Frerich et al         | 2000 | Mund Kiefer Gesichtschir.        | No gynaecological malignancies |
| Arrosagaray et al     | 1987 | J Clin Microbiol.                | No gynaecological malignancies |
| Wu et al              | 2010 | J Vasc Surg                      | No gynaecological malignancies |
| Gajendrareddy et al   | 2017 | J Periodontal Res.               | No hyperbaric oxygen therapy   |
| Laubach et al         | 2018 | Hautarzt.                        | No hyperbaric oxygen therapy   |
| Kanji et al           | 2017 | Mediators Inflamm.               | No hyperbaric oxygen therapy   |
| Walter et al          | 2014 | Eur J Clin Microbiol Infect Dis. | No hyperbaric oxygen therapy   |
| Patel et al           | 2012 | Plast Reconstr Surg.             | No hyperbaric oxygen therapy   |
| Zhu et al             | 2011 | Med Hypotheses.                  | No hyperbaric oxygen therapy   |
| Moen et al            | 2012 | BMC Cancer.                      | No hyperbaric oxygen therapy   |
| Vescovi P et al       | 2010 | Minerva Stomatol.                | No hyperbaric oxygen therapy   |
| Borendal Wodlin et al | 2011 | BJOG.                            | No hyperbaric oxygen therapy   |
| Palaniswamy C et al   | 2011 | Clin Cardiol.                    | No hyperbaric oxygen therapy   |

|                    |      |                                       |                              |
|--------------------|------|---------------------------------------|------------------------------|
| Hirn M et al       | 1989 | Ann Chir Gynecol.                     | No hyperbaric oxygen therapy |
| Fletcher et al     | 1972 | Am J Roentgenol Radium Ther Nucl Med. | No hyperbaric oxygen therapy |
| Barber et al       | 1970 | Minn Med.                             | No hyperbaric oxygen therapy |
| Krochak et al      | 1986 | Gynecol Oncol.                        | No hyperbaric oxygen therapy |
| Puckett et al      | 2017 | Cureus.                               | No hyperbaric oxygen therapy |
| Thompson et al     | 2013 | J Neurotrauma.                        | No hyperbaric oxygen therapy |
| Oines et al        | 2014 | World J Gastroenterol.                | No hyperbaric oxygen therapy |
| Mitrovic et al     | 2006 | Bosn J Basic Med Sci.                 | Other comparison             |
| Hu et al           | 2008 | Acta Neurochir Suppl.                 | Other comparison             |
| Takeyama et al     | 2007 | Knee Surg Sports Traumatol Artrosc.   | Other comparison             |
| Van Voorhis et al  | 2005 | Fertil Steril.                        | Other comparison             |
| Leverment et al    | 2004 | Undersea Hyperb Med.                  | Other comparison             |
| MacKenzie et al    | 2003 | Transplant Proc.                      | Other comparison             |
| Dimitrijevič et al | 1999 | Wound Reair Regen.                    | Other comparison             |
| Zhou et al         | 2015 | Neurocrit Care.                       | Other comparison             |
| Assali et al       | 1968 | Circ Res.                             | Other comparison             |
| Perrin et al       | 1970 | Am J Obstet Gynecol.                  | Other comparison             |
| Sokolova et al     | 1980 | Akush Ginekol (Mosk).                 | Other comparison             |
| Choo-Kang et al    | 1999 | J Pediatr Gastroenterol Nutr.         | Other comparison             |
| Dische et al       | 1999 | Radiother Oncol.                      | Other outcome measure        |
| No authors         | 1978 | Lancet.                               | Other outcome measure        |
| Watson et al       | 1978 | Br J Radiol.                          | Other outcome measure        |
| Dische et al       | 1983 | Br J Radiol.                          | Other outcome measure        |
| Ward et al         | 1979 | Clin Radiol.                          | Other outcome measure        |
| Cade et al         | 1978 | Clin Radiol.                          | Other outcome measure        |

|                  |      |                                                   |                         |
|------------------|------|---------------------------------------------------|-------------------------|
| Brady et al      | 1981 | Int J Radiat Oncol Biol Phys.                     | Other outcome measure   |
| Dische et al     | 1974 | Br J Radiol.                                      | Other outcome measure   |
| Ward et al       | 1974 | Br J Radiol.                                      | Other outcome measure   |
| Johnson et al    | 1974 | Am J Roentgenol Radium Ther Nucl Med.             | Other outcome measure   |
| Nikitina et al   | 1978 | Vopr Onkol.                                       | Other outcome measure   |
| Smith et al      | 1970 | Br J Radiol.                                      | Other outcome measure   |
| Bewley et al     | 1970 | Br J Radiol.                                      | Other outcome measure   |
| Bates et al      | 1969 | Br J Radiol.                                      | Other outcome measure   |
| Dobrotin et al   | 1973 | Sov Med.                                          | Other outcome measure   |
| Zel'vin et al    | 1979 | Vopr Onkol.                                       | Other outcome measure   |
| Fletcher et al   | 1977 | Cancer.                                           | Other outcome measure   |
| Liu et al        | 2021 | Adv Sci (Weinh).                                  | Other outcome measure   |
| Alagoz et al     | 1995 | Cancer.                                           | Other research question |
| Hirst et al      | 1986 | Int J Radiat Oncol Biol Phys.                     | Other research question |
| Migliorati et al | 2005 | Cancer.                                           | Other research question |
| Gaffney et al    | 2014 | Int J Gynecol Cancer.                             | Other research question |
| Bennett et al    | 2012 | Cochrane Database Syst Rev.                       | Other research question |
| Li et al         | 2018 | ACS Appl Mater Interfaces.                        | Other research question |
| Ogawa et al      | 2013 | Int J Clin Oncol.                                 | Other research question |
| Sirin et al      | 2011 | Int J Med Sci.                                    | Other research question |
| Wang et al       | 2011 | Spine (Phila Pa 1976).                            | Other research question |
| Cummins et al    | 2010 | J Cardiovasc Transl Res.                          | Other research question |
| Niu et al        | 2011 | J Orthop Res.                                     | Other research question |
| Jan et al        | 2010 | Oral Surg Oral Med Oral Pathol Oral Radiol Endod. | Other research question |
| Moen et al       | 2009 | BMC Cancer.                                       | Other research question |

|                     |      |                                       |                         |
|---------------------|------|---------------------------------------|-------------------------|
| Messier et al       | 1990 | Undersea Biomed Res.                  | Other research question |
| Selvendiran et al   | 2010 | Cancer Biol Ther.                     | Other research question |
| Friedman et al      | 2003 | Ann Plat Surg.                        | Other research question |
| Monies-Chass et al  | 1975 | J Laryngol Otol.                      | Other research question |
| Blanchette et al    | 2014 | Hawaii J Med Public Health.           | Other research question |
| Johnson et al       | 1979 | Int J Radiat Oncol Biol Phys.         | Other research question |
| Curet et al         | 1971 | Am J Obstet Gynecol.                  | Other research question |
| Dische et al        | 1980 | Br J Radiol.                          | Other research question |
| Grant W 3rd et al   | 1975 | Br J Radiol.                          | Other research question |
| Brady et al         | 1976 | Cancer.                               | Other research question |
| Greenberger et al   | 2001 | Antioxid Redox Signal.                | Other research question |
| Bornstein et al     | 1964 | Medicine (Baltimore).                 | Other research question |
| Chiang et al        | 2016 | Int J Med Sci.                        | Other research question |
| Daraei et al        | 2014 | Am J Otolaryngol.                     | Other research question |
| Pontonnier et al    | 1970 | Bull Fed Soc Gynecol Obstet Lang Fr.  | Other research question |
| Ersan et al         | 1995 | Langenbecks Arch Chir.                | Other research question |
| Atkins et al        | 1965 | Am J Roentgenol Radium Ther Nucl Med. | Other research question |
| Dar'ialova et al    | 1979 | Akush Ginekol (Mosk).                 | Other research question |
| Dische et al        | 1980 | Br J Cancer Suppl.                    | Other research question |
| Shuvaeva et al      | 1986 | Sov Med.                              | Other research question |
| Porai-Koshits et al | 1974 | Akush Ginekol (Mosk).                 | Other research question |
| Percival et al      | 1974 | Proc R Soc Med.                       | Other research question |
| Lu et al            | 2015 | J Oral Maxillofac Surg.               | Other research question |
| Zwaans et al        | 2018 | Int Urol Nephrol.                     | Other research question |
| Jia et al           | 2020 | Gynecol Oncol.                        | Other research question |



|               |      |                             |                         |
|---------------|------|-----------------------------|-------------------------|
| JÃ³nior et al | 2020 | Radiat Oncol.               | Other research question |
| Silva et al   | 2021 | Connect Tissue Res.         | Other research question |
| Cooper et al  | 2021 | StatPearls [Internet].      | Other research question |
| Liao et al    | 2020 | Clin Oral Investig.         | Other research question |
| Yuan et al    | 2020 | Int J Mol Sci.              | Other research question |
| Engel et al   | 2020 | Clin Hemorheol Microcirc.   | Other research question |
| Kruize et al  | 2020 | Dermatol Surg.              | Other research question |
| Wang et al    | 2020 | Biomater Sci.               | Other research question |
| Lin et al     | 2019 | Osteoarthritis Cartilage.   | Other research question |
| Reischl et al | 2021 | Langenbecks Arch Surg.      | Other research question |
| Bennett et al | 2005 | Cochrane Database Syst Rev. | Other research question |
| Miles et al   | 2014 | Cochrane Database Rev.      | Systematic review       |
| Denton et al  | 2003 | Cochrane Database Syst Rev. | Systematic review       |
| Bennett et al | 2018 | Cochrane Database Syst Rev. | Systematic review       |
| Allen et al   | 2012 | Support Care Cancer.        | Systematic review       |
| Bennett et al | 2008 | Cancer Treat Rev.           | Systematic review       |
| Yuan et al    | 2020 | Front Oncol.                | Systematic review       |
| Lopes et al   | 2018 | Undersea Hyperb Med.        | Vulvar resection        |
