# Supplementary material for: Hyperbaric oxygen treatment for late radiation-induced tissue toxicity in treated gynaecological cancer patients: a systematic review
Source: Springer Nature journal article supplement (doi:10.1186/s13014-022-02067-6), 2022-10-06
Supplement: MOESM5 [file 23577658]

**Table 8.** Reasons of exclusion from Embase search

| Author(s)        | Year | Journal abbreviation          | Reason of exclusion   |
|------------------|------|-------------------------------|-----------------------|
| Maher et al      | 2007 | Clin Oncol.                   | Article not available |
| Tewari et al     | 2002 | J Obstet Gynaecol Res.        | Article not available |
| Devita et al     | 1999 | Cancer J Sci Am.              | Article not available |
| No authors       | 1997 | Consultant.                   | Article not available |
| Yusa et al       | 1986 | Hiroshima J Anesth.           | Article not available |
| Vigliotti et al  | 1986 | Clin Obstet Gynecol.          | Article not available |
| Rasstrigin et al | 1985 | Anesteziol Reanimatol.        | Article not available |
| Plenk et al      | 1981 | Int J Radiat Oncol Biol Phys. | Article not available |
| Kiseleva et al   | 1981 | Med Radiol.                   | Article not available |
| Dische et al     | 1979 | Br J Radiol.                  | Article not available |
| Ward et al       | 1978 | Br J Radiol.                  | Article not available |
| Vagner et al     | 1977 | Vopr Onkol.                   | Article not available |
| Arimura et al    | 1976 | Acta Obstet GYnecol Jpn.      | Article not available |
| Bolla et al      | 1975 | Rev Med Alpes Fr.             | Article not available |
| Hamada et al     | 1971 | Gan No Rinsho.                | Article not available |
| Zebro et al      | 1969 | Patol Pol.                    | Article not available |
| Masari et al     | 2019 | Int J Gynecol Cancer.         | Case report           |
| Qiao et al       | 2019 | Int J Urol.                   | Case report           |
| Koh et al        | 2017 | BJU Int.                      | Case report           |
| Fumihiko et al   | 2017 | J Obstet Gynecol Res.         | Case report           |
| Costa et al      | 2015 | Int J Gynecol Cancer.         | Case report           |
| McDonald et al   | 2015 | Am J Gastroenterol.           | Case report           |
| Hayashi et al    | 2014 | J Med Case Rep.               | Case report           |

|                  |      |                                   |                                |
|------------------|------|-----------------------------------|--------------------------------|
| Geisler et al    | 2008 | J Reprod Med.                     | Case report                    |
| Micha et al      | 2008 | J Reprod Med.                     | Case report                    |
| Huddy et al      | 2006 | Eur J Gastroenterol Hepatol.      | Case report                    |
| Wang et al       | 1999 | Eur J Obstet Gynecol Reprod Biol. | Case report                    |
| Ishibashi et al  | 1996 | Jpn J Urol.                       | Case report                    |
| Hamour et al     | 1996 | Lancet.                           | Case report                    |
| Schoenrock et al | 1986 | Urology.                          | Case report                    |
| Kaercher et al   | 1975 | Wien Klin Wochenschr.             | Case report                    |
| Yoshimizu et al  | 2017 | Dig Endosc.                       | Case series                    |
| Terada et al     | 2003 | Nishinohon J Urol.                | Case series                    |
| Lee et al        | 1994 | Undersea Hyperb Med.              | Case series                    |
| Weiss et al      | 1989 | J Urol.                           | Case series                    |
| Miyazato et al   | 1998 | Jpn J Urol.                       | Language                       |
| Bates et al      | 1974 | Br J Radiol.                      | Letter                         |
| Yip et al        | 2013 | Ther Adv Urol.                    | No gynaecological malignancies |
| Adachi et al     | 2013 | Mol Clin Oncol.                   | No gynaecological malignancies |
| Oronsky et al    | 2011 | Transl Oncol.                     | No gynaecological malignancies |
| Degener et al    | 2015 | BMC Urol.                         | No gynaecological malignancies |
| Neheman et al    | 2005 | BJU Int.                          | No gynaecological malignancies |
| Cagetti et al    | 2021 | Gynecol Oncol.                    | No hyperbaric oxygen therapy   |
| Ortiz et al      | 2021 | Curr Neuropharmacol.              | No hyperbaric oxygen therapy   |
| Chapman et al    | 2020 | Gynecol Oncol.                    | No hyperbaric oxygen therapy   |
| Hernandez et al  | 2020 | BMJ Case Rep.                     | No hyperbaric oxygen therapy   |
| Männle et al     | 2020 | Onkologe.                         | No hyperbaric oxygen therapy   |
| Tanaka et al     | 2019 | JA Clin Rep.                      | No hyperbaric oxygen therapy   |

|                        |      |                           |                              |
|------------------------|------|---------------------------|------------------------------|
| Goucher et al          | 2019 | Can Urol Assoc J.         | No hyperbaric oxygen therapy |
| Wang et al             | 2019 | Cancers.                  | No hyperbaric oxygen therapy |
| Lobo et al             | 2018 | Urology.                  | No hyperbaric oxygen therapy |
| Ohno et al             | 2018 | Cancers.                  | No hyperbaric oxygen therapy |
| Wang et al             | 2018 | Trends Pharmacol Sci.     | No hyperbaric oxygen therapy |
| Natesan et al          | 2016 | Int J Gynecol Cancer.     | No hyperbaric oxygen therapy |
| Curtis et al           | 2016 | Crit Rev Oncol Hematol.   | No hyperbaric oxygen therapy |
| Sanders et al          | 2016 | Am J Otolaryngol.         | No hyperbaric oxygen therapy |
| Murakami et al         | 2016 | Anticancer Res.           | No hyperbaric oxygen therapy |
| Lewis et al            | 2016 | Brachytherapy.            | No hyperbaric oxygen therapy |
| Hill et al             | 2015 | Semin Radiat Oncol.       | No hyperbaric oxygen therapy |
| Gupta et al            | 2015 | Am J Case Rep.            | No hyperbaric oxygen therapy |
| Murakami et al         | 2014 | Radiat Oncol.             | No hyperbaric oxygen therapy |
| D'Souza et al          | 2014 | Brachytherapy.            | No hyperbaric oxygen therapy |
| Vargo et al            | 2014 | Radiother Oncol.          | No hyperbaric oxygen therapy |
| Busk et al             | 2013 | Q J Nucl Med Mol Imaging. | No hyperbaric oxygen therapy |
| Jensen et al           | 2013 | Int J Gynecol Cancer.     | No hyperbaric oxygen therapy |
| Sahakitrungruang et al | 2012 | Dis Colon Rectum.         | No hyperbaric oxygen therapy |
| Maccio et al           | 2012 | Cytokine.                 | No hyperbaric oxygen therapy |
| Ho et al               | 2009 | Malays J Med Sci.         | No hyperbaric oxygen therapy |
| Gerber et al           | 2008 | Am Fam Physician.         | No hyperbaric oxygen therapy |
| Adamski et al          | 2008 | Cancer Treat Rev.         | No hyperbaric oxygen therapy |
| Groenman et al         | 2008 | J Minim Invasive Gynecol. | No hyperbaric oxygen therapy |
| Robinson et al         | 2008 | Medicine.                 | No hyperbaric oxygen therapy |
| Van den Wyngaert et al | 2006 | Ann Oncol.                | No hyperbaric oxygen therapy |

|                       |      |                                       |                              |
|-----------------------|------|---------------------------------------|------------------------------|
| Sharma et al          | 2005 | J Indian Acad Clin Med.               | No hyperbaric oxygen therapy |
| Powell et al          | 2003 | J Pelvic Med Surg.                    | No hyperbaric oxygen therapy |
| Martin-Loeches et al  | 2003 | Arch Gynecol Obstet.                  | No hyperbaric oxygen therapy |
| Levenback et al       | 1995 | Clin Cons Obstet Gynecol.             | No hyperbaric oxygen therapy |
| Alvaro-Villegas et al | 2011 | Rev Esp Enferm Dig.                   | Other comparison             |
| Alvaro-Villegas et al | 2010 | Gastrointest Endosc.                  | Other comparison             |
| Ward et al            | 1979 | Clin Radiol.                          | Other outcome measure        |
| Zelvin et al          | 1979 | Vopr Onkol.                           | Other outcome measure        |
| Watson et al          | 1978 | Br J Radiol.                          | Other outcome measure        |
| Dische et al          | 1978 | Br J Radiol.                          | Other outcome measure        |
| Bush et al            | 1978 | Lancet.                               | Other outcome measure        |
| Cade et al            | 1978 | Clin Radiol.                          | Other outcome measure        |
| Fletcher et al        | 1977 | Cancer.                               | Other outcome measure        |
| Ward et al            | 1974 | Br J Radiol.                          | Other outcome measure        |
| Dische et al          | 1974 | Br J Radiol.                          | Other outcome measure        |
| Johnson et al         | 1974 | Am J Roentgenol Radium Ther Nucl Med. | Other outcome measure        |
| Dische et al          | 1983 | Br J Radiol.                          | Other outcome measure        |
| Nikitina et al        | 1978 | Vopr Onkol.                           | Other outcome measure        |
| Chapman et al         | 2021 | Brachytherapy.                        | Other research question      |
| Jethwa et al          | 2020 | J Radiat Oncol.                       | Other research question      |
| Shejul et al          | 2020 | Radiother Oncol.                      | Other research question      |
| Mulvihill et al       | 2020 | Birth Defects Res.                    | Other research question      |
| Song et al            | 2020 | J Cancer Res Clin Oncol.              | Other research question      |
| Bosch et al           | 2020 | Neurourol Urodyn.                     | Other research question      |
| Klement et al         | 2020 | Expert Rev Anticancer Ther.           | Other research question      |

|                  |      |                                      |                         |
|------------------|------|--------------------------------------|-------------------------|
| Kim et al        | 2020 | J Gynecol Oncol.                     | Other research question |
| Murofushi et al  | 2020 | Int J Gynecol Cancer.                | Other research question |
| Skwarski et al   | 2020 | Cancer Drug Discov Dev.              | Other research question |
| Forster et al    | 2019 | Phys Med.                            | Other research question |
| Waisaing et al   | 2019 | Int J Urol.                          | Other research question |
| Zulkifle et al   | 2019 | BMJ Case Rep.                        | Other research question |
| Zwaans et al     | 2018 | Int Urol Nephrol.                    | Other research question |
| Bennett et al    | 2018 | Diving Hyperb Med.                   | Other research question |
| Fernandes et al  | 2015 | Curr Opin Oncol.                     | Other research question |
| Liang et al      | 2015 | Mol Med Rep.                         | Other research question |
| Heyboer et al    | 2014 | Stem Cell Res.                       | Other research question |
| Gaffney et al    | 2014 | Int J Gynecol Cancer.                | Other research question |
| Marson et al     | 2014 | Current Bladder Dysfunct Rep.        | Other research question |
| Vargo et al      | 2014 | Brachytherapy.                       | Other research question |
| Vargo et al      | 2013 | Brachytherapy.                       | Other research question |
| Broderick et al  | 2012 | BJOG: Int J Obstet Gynecol.          | Other research question |
| Bennett et al    | 2012 | Cochrane Database Syst Rev.          | Other research question |
| Azeem et al      | 2012 | Am J Clin Oncol: Cancer Clin Trials. | Other research question |
| Chino et al      | 2010 | Dig Endosc.                          | Other research question |
| Jensen et al     | 2010 | Brachytherapy.                       | Other research question |
| Al-Waili et al   | 2005 | Med Sci Monit.                       | Other research question |
| Varlotto et al   | 2005 | Int J Radiat Oncol Biol Phys.        | Other research question |
| Migliorati et al | 2005 | Cancer.                              | Other research question |
| Harrison et al   | 2002 | Oncologist.                          | Other research question |
| Coleman et al    | 2002 | J Clin Oncol.                        | Other research question |

|                   |      |                               |                         |
|-------------------|------|-------------------------------|-------------------------|
| Grigsby et al     | 1999 | Cancer Control.               | Other research question |
| Pomeroy et al     | 1998 | J Urol.                       | Other research question |
| Miura et al       | 1996 | Int Urol Nephrol.             | Other research question |
| Alagoz et al      | 1995 | Cancer.                       | Other research question |
| Teicher et al     | 1995 | Hematol Oncol Clin North Am.  | Other research question |
| Thomas et al      | 1994 | Semin Radiat Oncol.           | Other research question |
| Eifel et al       | 1993 | Gynecol Oncol.                | Other research question |
| Searly et al      | 1989 | Cancer.                       | Other research question |
| Hirst et al       | 1986 | Int J Radiat Oncol Biol Phys. | Other research question |
| Dische et al      | 1980 | Br J Radiol.                  | Other research question |
| Johnson et al     | 1979 | Int J Radiat Oncol Biol Phys. | Other research question |
| Fryer et al       | 1979 | Br J Radiol.                  | Other research question |
| Glassburn et al   | 1977 | Cancer.                       | Other research question |
| Brady et al       | 1976 | Cancer.                       | Other research question |
| Volkova et al     | 1976 | Med Radiol.                   | Other research question |
| Wiernik et al     | 1975 | Br J Radiol.                  | Other research question |
| Grant III et al   | 1975 | Br J Radiol.                  | Other research question |
| Rounthwaite et al | 1968 | Laryngoscope.                 | Other research question |
| Ogawa et al       | 2013 | Int J Clin Oncol.             | Other research question |
| McLaughlin et al  | 2000 | Cancer Res Ther Control.      | Other research question |
| Dische et al      | 1999 | Radiother Oncol.              | Other research question |
| Noordzij et al    | 1993 | Int Urogynecol J.             | Other research question |
| Fernández et al   | 2021 | Clin Transl Oncol.            | Review article          |
| Creutzberg et al  | 2016 | Lancet Oncol.                 | Review article          |
| Feldmeier et al   | 2011 | Curr Oncol.                   | Review article          |

|                 |      |                       |                   |
|-----------------|------|-----------------------|-------------------|
| Datta et al     | 2018 | Strahlenther Onkol.   | Systematic review |
| Moen et al      | 2012 | Target Oncol.         | Systematic review |
| Allen et al     | 2012 | Support Care Cancer.  | Systematic review |
| Bennett et al   | 2008 | Cancer Treat Rev.     | Systematic review |
| Daruwalla et al | 2006 | World J Surg.         | Systematic review |
| Lopes et al     | 2016 | Int J Gynecol Cancer. | Vulvar resection  |
