# Supplementary material for: Hyperbaric oxygen treatment for late radiation-induced tissue toxicity in treated gynaecological cancer patients: a systematic review
Source: Springer Nature journal article supplement (doi:10.1186/s13014-022-02067-6), 2022-10-06
Supplement: MOESM6 [file 23577658]

**Table 9.** Reasons of exclusion from the Cochrane library search

| Author(s)             | Year              | Journal abbreviation                  | Reason of exclusion     |
|-----------------------|-------------------|---------------------------------------|-------------------------|
| Plenk et al           | 1981              | Int J Radiat Oncol Biol Phys.         | Article not available   |
| Plenk et al           | 1972              | Am J Roentgenol Radium Ther Nucl Med. | Article not available   |
| Tobin et al           | 1971              | Am J Roentgenol Radium Ther Nucl Med. | Article not available   |
| No authors            | Not published yet | Not published yet                     | Not published yet       |
| Ward et al            | 1979              | Clin Radiol.                          | Other outcome measure   |
| Brady et al           | 1981              | Int J Radiat Oncol Biol Phys.         | Other outcome measure   |
| Ward et al            | 1974              | Br J Radiol.                          | Other outcome measure   |
| Dische et al          | 1974              | Br J Radiol.                          | Other outcome measure   |
| Cade et al            | 1978              | Clin Radiol.                          | Other outcome measure   |
| Fletcher et al        | 1977              | Cancer.                               | Other outcome measure   |
| Dische et al          | 1999              | Radiother Oncol.                      | Other outcome measure   |
| Watson et al          | 1978              | Br J Radiol.                          | Other outcome measure   |
| Dische et al          | 1980              | Br J Radiol.                          | Other research question |
| Shao et al            | 2012              | BJU Int.                              | Other research question |
| Van de Wetering et al | 2016              | Cochrane Database Syst Rev.           | Systematic review       |
| Bennett et al         | 2018              | Cochrane Database Syst Rev.           | Systematic review       |
| Miles et al           | 2014              | Cochrane Database Syst Rev.           | Systematic review       |
| Denton et al          | 2003              | Cochrane Database Syst Rev.           | Systematic review       |
