# Supplementary material for: Hyperbaric oxygen treatment for late radiation-induced tissue toxicity in treated gynaecological cancer patients: a systematic review
Source: Springer Nature journal article supplement (doi:10.1186/s13014-022-02067-6), 2022-10-06
Supplement: MOESM7 [file 23577658]

**Table 10.** Study design of the included studies

| Author, year                          | Title                                                                                                                                                      | Journal abbreviation          | Study design                                       |
|---------------------------------------|------------------------------------------------------------------------------------------------------------------------------------------------------------|-------------------------------|----------------------------------------------------|
| Oscarsson et al, 2013 <sup>[14]</sup> | Hyperbaric oxygen treatment in radiation-induced cystitis and proctitis: a prospective cohort study on patient-perceived quality of recovery.              | Int J Radiat Oncol Biol Phys. | Prospective cohort study                           |
| Glover et al, 2016 <sup>[15]</sup>    | Hyperbaric oxygen for patients with chronic bowel dysfunction after pelvic radiotherapy (HOT2): a randomised, double-blind, sham-controlled phase 3 trial. | Lancet Oncol.                 | Randomised controlled trial                        |
| Oscarsson et al, 2019 <sup>[16]</sup> | Radiation-induced cystitis treated with hyperbaric oxygen therapy (RICH-ART): a randomised, controlled, phase 2-3 trial.                                   | Lancet Oncol.                 | Randomised controlled trial                        |
| Oliai et al, 2012 <sup>[17]</sup>     | Hyperbaric oxygen therapy for radiation-induced cystitis and proctitis.                                                                                    | Int J Radiat Oncol Biol Phys. | Retrospective study                                |
| Sidik et al, 2007 <sup>[18]</sup>     | Does hyperbaric oxygen administration decrease side effect and improve quality of life after pelvic radiation?                                             | Acta Med Indones.             | Open randomized controlled trial                   |
| Clarke et al, 2008 <sup>[19]</sup>    | Hyperbaric oxygen treatment of chronic refractory radiation proctitis: a randomized and controlled double-blind crossover trial with long-term follow-up.  | Int J Radiat Oncol Biol Phys. | Randomised controlled double-blind crossover trial |
| Parra et al, 2011 <sup>[20]</sup>     | [Management of hemorrhagic radiation cystitis with hyperbaric oxygen therapy].                                                                             | Actas Urol Esp.               | Retrospective study                                |

|                                       |                                                                                                                                   |                               |                                                            |
|---------------------------------------|-----------------------------------------------------------------------------------------------------------------------------------|-------------------------------|------------------------------------------------------------|
| Rud et al, 2009 <sup>[21]</sup>       | Hyperbaric oxygen therapy for late radiation tissue injury in gynaecological patients.                                            | Support Care Cancer.          | Prospective study                                          |
| Safra et al, 2008 <sup>[22]</sup>     | Improved quality of life with hyperbaric oxygen therapy in patients with persistent pelvic radiation-induced toxicity.            | Clin Oncol (R Coll Radiol).   | Retrospective study                                        |
| Jones et al, 2006 <sup>[23]</sup>     | Treatment of radiation proctitis with hyperbaric oxygen.                                                                          | Radiother Oncol.              | Retrospective study                                        |
| Williams et al, 1992 <sup>[24]</sup>  | The treatment of pelvic soft tissue radiation necrosis with hyperbaric oxygen.                                                    | Am J Obstet Gynecol.          | Prospective observational study                            |
| Feldmeier et al, 1996 <sup>[25]</sup> | Hyperbaric oxygen an adjunctive treatment for delayed radiation injuries of the abdomen and pelvis.                               | Undersea Hyperb Med.          | Retrospective analysis                                     |
| Al-Ali et al, 2010 <sup>[26]</sup>    | Is treatment of hemorrhagic radiation cystitis with hyperbaric oxygen effective?                                                  | Urol Int.                     | Retrospective study                                        |
| Bui et al, 2004 <sup>[27]</sup>       | The efficacy of hyperbaric oxygen therapy in the treatment of radiation-induced late side effects.                                | Int J Radiat Oncol Biol Phys. | Retrospective study                                        |
| Andren et al, 2020 <sup>[28]</sup>    | An observational trial to establish the effect of hyperbaric oxygen treatment on pelvic late radiation injury due to radiotherapy | Diving Hyperb Med.            | Combined retrospective and prospective observational study |

|                                                 |                                                                                                    |                       |                     |
|-------------------------------------------------|----------------------------------------------------------------------------------------------------|-----------------------|---------------------|
| Ngoo et al, 2018 <sup>[29]</sup>                | The utility of hyperbaric oxygen therapy in managing haemorrhagic radiation-induced cystitis       | Int J Urol.           | Retrospective study |
| Lin et al, 2017 <sup>[30]</sup>                 | Hyperbaric oxygen therapy for hemorrhagic radiation cystitis                                       | Formos J Surg.        | NR                  |
| Ribeiro de Oliveira et al, 2015 <sup>[31]</sup> | Hyperbaric oxygen therapy for refractory radiation-induced hemorrhagic cystitis                    | Int J Urol.           | Retrospective study |
| Mougin et al, 2016 <sup>[32]</sup>              | Evaluation of hyperbaric oxygen therapy in the treatment of radiation-induced hemorrhagic cystitis | Urology.              | Retrospective study |
| Ferreira et al, 2014 <sup>[33]</sup>            | Hyperbaric oxygen for long-term complications of radiation cystitis                                | J Radiother Pract.    | Retrospective study |
| Fink et al, 2006 <sup>[34]</sup>                | Hyperbaric oxygen therapy for delayed radiation injuries in gynecological cancers                  | Int J Gynecol Cancer. | Retrospective study |
