# Supplementary material for: Hyperbaric oxygen treatment for late radiation-induced tissue toxicity in treated gynaecological cancer patients: a systematic review
Source: Springer Nature journal article supplement (doi:10.1186/s13014-022-02067-6), 2022-10-06
Supplement: MOESM8 [file 23577658]

**Table 11. Time**

| Study, year                           | Time radiation to injury (years)                                         | Time injury to therapy (years)                 | Follow-up (months) |
|---------------------------------------|--------------------------------------------------------------------------|------------------------------------------------|--------------------|
| Oscarsson et al, 2013 <sup>[14]</sup> | Urinary symptoms 1.5 (mean)<br>Bowel symptoms mean 0.5 (mean)            | NR                                             | 6-12               |
| Glover et al, 2016 <sup>[15]</sup>    | Treatment 3.5 (IQR 2.3–9.7)<br>Control 3.9 (IQR 2.5-5.7)                 | NR                                             | 13.2 (median)      |
| Oscarsson et al, 2019 <sup>[16]</sup> | Treatment 4.4 <sup>a</sup> (SD 5.1)<br>Control 4.1 <sup>a</sup> (SD 3.4) | Treatment 3.1 (SD 4.8)<br>Control 2.8 (SD 2.8) | 6-8                |
| Oliai et al, 2012 <sup>[17]</sup>     | Cystitis 2.5 (median)<br>Proctitis 0.9 (median)                          | NR                                             | 39 (median)        |
| Sidik et al, 2007 <sup>[18]</sup>     | NR                                                                       | NR                                             | 6                  |
| Clarke et al, 2008 <sup>[19]</sup>    | 1.5 * (mean)                                                             | NR                                             | 12-60              |
| Parra et al, 2011 <sup>[20]</sup>     | 2.6 (mean)                                                               | 0.4 (mean)                                     | 21.2 (mean)        |
| Rud et al, 2009 <sup>[21]</sup>       | 3.5 <sup>a</sup> (median)                                                | 3.5 <sup>a</sup> (median)                      | 6                  |
| Safra et al, 2008 <sup>[22]</sup>     | 2.7 <sup>a</sup> (mean)                                                  | 2.7 <sup>a</sup> (mean)                        | NR                 |
| Jones et al, 2006 <sup>[23]</sup>     | NR                                                                       | 1.7 (mean)                                     | 25 (median)        |
| Williams et al, 1992 <sup>[24]</sup>  | NR                                                                       | NR                                             | NR                 |

|                                                 |              |              |               |
|-------------------------------------------------|--------------|--------------|---------------|
| Feldmeier et al, 1996 <sup>[25]</sup>           | 8.3 * (mean) | 2.8 * (mean) | NR            |
| Al-Ali et al, 2010 <sup>[26]</sup>              | NR           | 0.7 (mean)   | 18 (mean)     |
| Bui et al, 2004 <sup>[27]</sup>                 | NR           | NR           | NR            |
| Andren et al, 2020 <sup>[28]</sup>              | NR           | NR           | NR            |
| Ngoo et al, 2018 <sup>[29]</sup>                | 1.4          | 0.4 (median) | 5.1 (median)  |
| Lin et al, 2017 <sup>[30]</sup>                 | 9.9 (mean)   | NR           | 20.7 (mean)   |
| Ribeiro de Oliveira et al, 2015 <sup>[31]</sup> | 4.6 (mean)   | 1.1 (mean)   | 12 (mean)     |
| Mougin et al, 2016 <sup>[32]</sup>              | 3.2 (median) | 0.7 (mean)   | 15 (median)   |
| Ferreira et al, 2014 <sup>[33]</sup>            | 2.3 (median) | 0.7 (median) | 55.5 (median) |
| Fink et al, 2006 <sup>[34]</sup>                | 1.7 (mean)   | NR           | 32.5 (mean)   |

a: time from radiation to HBOT in years

NR = not reported

SD = standard deviation

IQR = interquartile range

\* = calculated time of only the gynaecological malignancies
