# Supplementary material for: Hyperbaric oxygen treatment for late radiation-induced tissue toxicity in treated gynaecological cancer patients: a systematic review
Source: Springer Nature journal article supplement (doi:10.1186/s13014-022-02067-6), 2022-10-06
Supplement: MOESM9 [file 23577658]

**Table 12.** Reported side effects

| Study, year                           | Reported side effects (number of patients)                                                                                                                                                                                                                                                                                                                                                                                                                                                                                                                                                                                                     |
|---------------------------------------|------------------------------------------------------------------------------------------------------------------------------------------------------------------------------------------------------------------------------------------------------------------------------------------------------------------------------------------------------------------------------------------------------------------------------------------------------------------------------------------------------------------------------------------------------------------------------------------------------------------------------------------------|
| Oscarsson et al, 2013 <sup>[14]</sup> | No side effects                                                                                                                                                                                                                                                                                                                                                                                                                                                                                                                                                                                                                                |
| Glover et al, 2016 <sup>[15]</sup>    | <p>Eye refractive change including myopia (n=19)</p> <p>Increased fatigue or tiredness (n=5)</p> <p>Ear pain or barotrauma (n=21)</p> <p>Tonsillitis grade 3 (n=1)</p> <p>Recurrent cancer of the vulva grade 4 (n=1)</p> <p>Malignant spinal cord compression grade 3 (n=1)</p> <p>Malignant paraortic lymph node involvement grade 3 (n=1)</p> <p>Recurrence of vomiting and dehydration grade 3 (n=1)</p> <p>Diarrhoea and fever associated with campylobacter infection grade 3 (n=1)</p> <p>Recurrence of abdominal pain, bloating, diarrhea, urinary tract infection grade 3 (n=1)</p> <p>Aneurysma grade 4 (n=1)</p>                    |
| Oscarsson et al, 2019 <sup>[16]</sup> | <p>Temporary pain in the ear (n=6)</p> <p>Barotrauma (n=4)</p> <p>Paracentesis of the tympanic membrane (n=1)</p> <p>Hyperoxia-induced transient myopia with changes in vision (n=5)</p> <p>Induced transient myopia (n=1)</p> <p>Panic attack related to pre-existing claustrophobia (n=1)</p> <p>Fatigue grade 1 (n=1)</p> <p>Infections grade 1 and grade 3 (n=7)</p> <p>Transient muscle cramps or pain grade 1 (n=5)</p> <p>Haematuria grade 1 and grade 3 (n=3)</p> <p>Diarrhoea grade 1 (n=2)</p> <p>Nausea grade 1 (n=1)</p> <p>Headache grade 1 (n=1)</p> <p>Death due to sepsis and cardiac failure unrelated to the study (n=1)</p> |
| Oliai et al, 2012 <sup>[17]</sup>     | Middle ear equilization changes manifesting as otalgia (n= 5)                                                                                                                                                                                                                                                                                                                                                                                                                                                                                                                                                                                  |

|                                                 |                                                                                                                                                                                                                                                                   |
|-------------------------------------------------|-------------------------------------------------------------------------------------------------------------------------------------------------------------------------------------------------------------------------------------------------------------------|
| Sidik et al, 2007 <sup>[18]</sup>               | NR                                                                                                                                                                                                                                                                |
| Clarke et al, 2008 <sup>[19]</sup>              | <p>Ear pain or discomfort (n=11)</p> <p>Tympanic membrane changes consistent with barotrauma (n=7)</p> <p>Tympanic membrane injury and middle ear effusion (n=1)</p> <p>Sinus barotrauma (n=1)</p> <p>Transient myopia (n=4)</p> <p>Confinement anxiety (n=2)</p> |
| Parra et al, 2011 <sup>[20]</sup>               | Barotraumatic otitis (n=2)                                                                                                                                                                                                                                        |
| Rud et al, 2009 <sup>[21]</sup>                 | NR                                                                                                                                                                                                                                                                |
| Safra et al, 2008 <sup>[22]</sup>               | No side effects                                                                                                                                                                                                                                                   |
| Jones et al, 2006 <sup>[23]</sup>               | <p>Minor otic barotrauma (n=4)</p> <p>Respiratory compromise (n=1)</p>                                                                                                                                                                                            |
| Williams et al, 1992 <sup>[24]</sup>            | Ruptured tympanum (n=1)                                                                                                                                                                                                                                           |
| Feldmeier et al, 1996 <sup>[25]</sup>           | <p>Persistent tumor and subsequently death (n=1)</p> <p>Gastrointestinal bleed and cardiac deterioration (n=1)</p> <p>Progressive necrosis of many pelvic viscera and died of complications secondary to radiation injury (n=1)</p>                               |
| Al-ali et al, 2010 <sup>[26]</sup>              | No side effects                                                                                                                                                                                                                                                   |
| Bui et al, 2004 <sup>[27]</sup>                 | <p>Hearing (n=10): hearing difficulties to ear pain and one had serious effusion in one ear</p> <p>Vision (n=3): one short-lived lens swelling and two accelerated cataract formation</p> <p>Epistaxis (n=1)</p>                                                  |
| Andren et al, 2020 <sup>[28]</sup>              | <p>Ear pain (n=11)</p> <p>Barotrauma (n=2)</p> <p>Myopia (n=4)</p>                                                                                                                                                                                                |
| Ngoo et al, 2018 <sup>[29]</sup>                | Barotrauma (n=2)                                                                                                                                                                                                                                                  |
| Lin et al, 2017 <sup>[30]</sup>                 | No side effects                                                                                                                                                                                                                                                   |
| Ribeiro de Oliveira et al, 2015 <sup>[31]</sup> | Mild middle ear barotrauma (n=3)                                                                                                                                                                                                                                  |
| Mougin et al, 2016 <sup>[32]</sup>              | <p>Barotitis media (n=9)</p> <p>Vision disorder (n=5)</p> <p>Finger paresthesia (n=1)</p>                                                                                                                                                                         |

|                                      |                                                                                              |
|--------------------------------------|----------------------------------------------------------------------------------------------|
|                                      | Pain during mobilization (n=1)<br>Discontinuation for adverse events (n=2)                   |
| Ferreira et al, 2014 <sup>[33]</sup> | Barotraumatic otitis (n=3)                                                                   |
| Fink et al, 2006 <sup>[34]</sup>     | Oxygen-toxic seizure (n=1)<br>Temporarily ear equilization problems or mild barotrauma (n=2) |

NR= not reported
